# Supplementary material
Source: PubMed Central journal article supplement (PMC4386461)
Supplement: MCB.00799-14_zmb999100629so1.pdf [file MCB.00799-14_zmb999100629so1.pdf]

## SUPPLEMENTAL MATERIAL

```

1 ATGGAAGACG CCAAAAACAT AAAGAAAGGC CCGGCCCAT TCTATCCGCT GGAAGATGGA ACCGCTGGAG AGCAACTGCA TAAGCTATG
91 AAGAGATACG CCTTGGTTCC TGAACAATT GCTTTTACAG ATGCACATAT CGAGGTGGAC ATCACTTACG CTGAGTACTT CGAAATGTCC
181 GTTCGGTTGG CAGAAGCTAT GAAACGATAT GGGCTGAATA CAAATCACAG AATCGTCGTA TGCAGTGAAT ACTCTCTTCA ATTCTTTATG
271 CCGGTGTTGG GCGCGTTATT TATCGGAGTT GCAGTTGCGC CCGCGAACGA CATTTATAAT GAACGTGAAT TGCTCAACAG TATGGGCATT
361 TCGCAGCCTA CCGTGGTGTT CTTTTCCAAA AAGGGGTGTC AAAAAATTTT GAACGTGCAA AAAAAGCTCC CAATCATCCA AAAAATFATT
451 ATCATGGATT CTAAAACGGA TTACCAGGGA TTTCAGTCGA TGTACACGTT CGTCACATCT CATCTACCTC CCGGTTTTAA TGAATACGAT
541 TTTGTGCCAG AGTCC TTCGA TAGGGACAAG ACAATTGCAC TGATCATGAA CTCCTCTGGA TCTACTGGTC TGCCTAAAGG TGTGCTCTG
631 CCTCATAGAA TGCCCTGCGT GAGATTCCTG CATGCCAGAG ATCCTATTTT TGGCAATCAA ATCATTCGGG ATACTGCGAT TTTAAGTGT
721 GTTCCATTCC ATCAGGTTT TGGAAATGTT ACTACACTCG GATATTTGAT ATGTGGATTT CGAGTCGTCT TAATGTATAG ATTTGAAGAA
811 GTTGTGTTTC TGAGGAGCCT TCAGGATTAC AAGATTCAAA GTGCGTCTCT GGTCCAACC CTATTCTCCT TCTTCGCCAA AAGCACTCTG
901 ATTGACAAAT ACGATTATC TAATTTACAC GAAATGCTT CTGGTGGCGC TCCCCTCTCT AAGGAAGTCG GGAAGCGGT TGCCAAGAGG
991 TTCCATCTGC CAGGTATCAG GCAAGGATAT GGGCTCACTG AGACTACATC AGCTATTCTG ATTACACCCG AGGGGGATGA TAAACCGGGC
1081 GCGGTCCGTA AAGTTGTCC ATTTTTTGAA GCGAAGGTTG TGGATCTGGA TACCGGAAA ACGCTGGGCG TTAATCAAAG AGGCGAACTG
1171 TGTGTGAGAG GTCCTATGAT TATGTCCGGT TATGTAAACA ATCCGGAAGC GACCAACGCC TTGATTGACA AGGATGGATG GCTACATCT
1261 GGAGACATAG CTTACTGGGA CGAAGACGAA CACTTCTTCA TCGTTGACCG CTGAAAGTCT CTGATTAAGT ACAAAGGCTA TCAGGTGGCT
1351 CCGCTGAAT TGAAATCCAT CTTGCTCCAA CACCCCAACA TCTTCGACGC AGGTGTCGCA GGTCTTCCCG ACGATGACGC CGGTGAACTT
1441 CCCGCCGCC TTGTTGTTTT GGAGCACGGA AAGACGATGA CGGAAAAAGA GATCGTGGAT TACGTCGCCA GTCAAGTAAC AACCGGAAA
1531 AAGTTGCGCG GAGGAGTTGT GTTTGTGGAC GAAGTACCGA AAGGTCTTAC CGGAAAACCT GACGCAAGAA AAATCAGAGA GATCCTCATA
1621 AAGGCCAAGA AGGGCGGAAA GATCGCCGTG (***)
1687 CTGCAATATC CGTATGACGT CCCGCACTAT GCAAGTTCTT ATCCATATGA CGTTCCAGAT TACGCTTCTA GATATCCGTA TGACGTCCC
1777 GACTATGCAAT GATGACACCG ATTATTTAAA GCTACAACAT ACGATATATA TACATGTGTA TATATGTATA CCTATGAATG TCAGTAAGTA
1867 TGTATACGAA CAGTATGATA CTGAAGATGA CAAGTAATG CATCATCTA TACGTGTCAT TCTGAACGAG GCGCGCTTTC CTTTTTCTT
1957 TTTGCTTTTT CTTTTTTTTT CTCTTGAAGT CGAGAAAAAA AATATAAAG AGATGGAGGA ACGGAAAAAA GTTAGTTGTG GTGATAGGTG
2047 GCAAGT

```

**K12** (\*\*\*) = AAGAAGAAAA AGAAGAAAA GAAGAAAAG AAGAAA

**RZ** (\*\*\*) = CCTGTCACCG GATGTGTTTT CCGGTCTGAT GAGTCCGTGA GGACGAAACA GGGG

**RZ\*** (\*\*\*) = CCTGTCCAAG GATGTGTTTT CCGGTCTGAT GAGTCCGTGA GGACGAAACA GGGG

**Figure S1. Luciferase reporters.** Nucleotide sequences of *LUC*, *LUC-K12-3HA*, *LUC-RZ-3HA*, *LUC-RZ\*-3HA*, and *LUC-RZt*. Shown is the luciferase *orf*, the three *HA* sequences (blue), the stop codon (red), and the 3'-*UTR*. The position at which *K12*, *RZ*, or *RZ\** is inserted is indicated (\*\*\*). The nucleotide sequence of *K12*, *RZ*, or *RZ\** is given below. Numbering of the nucleotide sequence refers to *LUC-K12-3HA*. Cleavage of *LUC-RZ-3HA* occurs 3' of *CCTCTG* within the *RZ* sequence (red arrow head). The position of the Northern probe is highlighted in yellow.

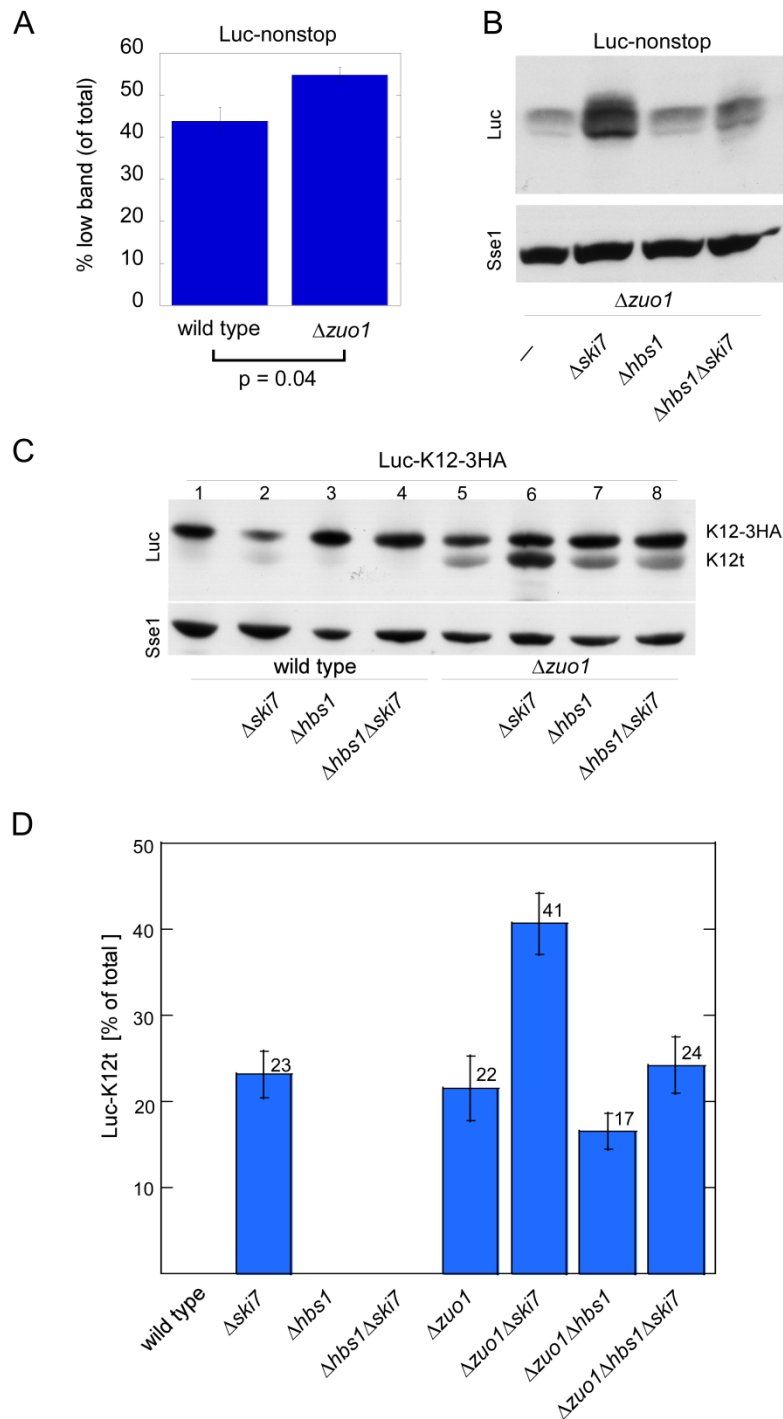

**Figure S2. Additive effects of  $\Delta ski7$  and  $\Delta zuo1$  in respect to the generation of truncated protein species.** (A) The  $\Delta zuo1$  mutation exerted a minor effect on the expression of truncated nonstop protein species. Shown is the quantification of 3 independent experiments, performed as in Fig. 2B. Error bars represent the standard error of the mean. The p value was calculated via Student's T-test. (B) Expression of Luc-nonstop depends mainly on Ski7 and Hsb1•Dom34. Luc-nonstop was expressed in  $\Delta zuo1$ ,  $\Delta zuo1 \Delta ski7$ ,  $\Delta zuo1 \Delta hbs1$ , and  $\Delta zuo1 \Delta hbs1 \Delta ski7$  strains. Total extracts of strains expressing Luc-nonstop were analyzed via immunoblotting with antibodies recognizing luciferase (Luc) and, as a loading control, Sse1. (C) The  $\Delta zuo1$  and  $\Delta ski7$  mutations exerted additive effects on the expression of Luc-K12t. The indicated strains harboring the Luc-K12-3HA reporter were analyzed as described in B. The position of Luc-K12-3HA (K12-3HA) and Luc-K12t (K12t) is indicated. (D) Quantification of the data presented in C. The quantification was performed as described in Fig. 5B. Shown are results of at least 3 independent experiments; error bars represent the standard error of the mean.

## Explanatory text

### **Hbs1•Dom34 and RAC/Ssb affect nonstop and polylysine protein expression via distinct mechanisms.**

The data presented in this manuscript revealed that truncated luciferase species can be generated by two distinct mechanisms, which differ in ribosome-release of the truncated polypeptide (Fig. 10). One mechanism was dependent on Sup35, which induced premature termination on polylysine-stalled ribosomes (Fig. 9). Sup35-dependent premature termination occurred at a sense codon and was independent of whether or not the mRNA contained a stop codon. Premature termination was enhanced in the absence of RAC/Ssb (Fig. 1). The second mechanism was dependent on Hbs1•Dom34, which induced polypeptide release from ribosomes stalled at the 3'-end of a stop codon-less mRNA (Fig. 3F and Fig. 4). Because Ski7 is involved in the efficient degradation of stop codon-less mRNA, Hbs1•Dom34-dependent expression was enhanced in a  $\Delta ski7$  strain (Fig. 3D and 3F). This mechanism was independent of Sup35 and RAC/Ssb (Fig. 3D and 3G). For details and references compare Results and Discussion.

The origin of truncated protein species may be complex, because both mechanisms can contribute to the expression of a single reporter construct. For example, Luc-nonstop and Luc-K12-3HA contain polylysine segments (Fig. 1A and 1B), which cause ribosome stalling followed by endonucleolytic cleavage (Fig. 1A and Fig. 10). As a result, expression of Luc-nonstop and Luc-K12-3HA reporters gave rise to mixed mRNA populations, from which truncated proteins were generated either by Hbs1•Dom34-dependent release (stop codon-less templates), which was enhanced in the absence of Ski7, or Sup35-dependent release (full length templates), which was enhanced in the absence of RAC/Ssb (Fig. S2).

### **Hbs1•Dom34-dependent release dominates upon Luc-nonstop expression**

The  $\Delta zuo1$  mutation exerted a rather minor effect on the production of truncated Luc-nonstop protein fragments (Fig. 2B and S2A). This suggested that Sup35-dependent release played only a minor role for the expression of truncated Luc-nonstop species. Consistently, the high level of Luc-nonstop expression in  $\Delta zuo1\Delta ski7$  (Fig. S2B) was strongly reduced in a  $\Delta zuo1\Delta hbs1\Delta ski7$  strain (Fig. S2B). The finding indicated that the bulk of Luc-nonstop was derived from Hbs1•Dom34-dependent translation of stop codon-less mRNA species.

### **Hbs1•Dom34 and Sup35 contribute equally to Luc-K12t expression**

Luc-K12-3HA expression was analyzed using the same set of strains employed for the analysis of the Luc-RZ-3HA reporter (Fig. 3D). In the wild type background (Fig. S2C lane 1-4, Fig. S2D) a fragment corresponding in size to Luc-K12t was detected in the  $\Delta ski7$  strain (Fig. S2C lane 2), but was not detected in the  $\Delta hbs1\Delta ski7$  strain (Fig. S2C, lane 4). This indicated the presence of stop codon-less mRNA fragments, which were stabilized by the  $\Delta ski7$  mutation and were expressed in an Hbs1•Dom34-dependent manner. In the  $\Delta zuo1$  background (Fig. S2C lane 5-8, Fig. S2D) the effect of  $\Delta ski7$  and  $\Delta hbs1$  was similar to that in the wild type background: when compared to the  $\Delta zuo1$  strain, expression of Luc-K12t was increased by ~ 20% in  $\Delta zuo1\Delta ski7$ , and was similar to  $\Delta zuo1$  in the  $\Delta zuo1\Delta hbs1\Delta ski7$  strain (Fig. S2C lane 5, 6, and 8). On top of that, Luc-K12t was generated in a process that was enhanced by the  $\Delta zuo1$  mutation and was independent of Hbs1•Dom34 and Ski7:

expression of Luc-K12t in the  $\Delta ski7$  and  $\Delta zuo1$  strains was additive (Fig. S2C, lane 2, 5, and 6) and Luc-K12t expression in the  $\Delta zuo1$  strain was not affected by the  $\Delta hbs1$  mutation (Fig. S2C, lane 1, 3, 5, and 7). This is consistent with a model in which a significant fraction of Luc-K12t was generated by Sup35-dependent release.
